# Supplementary material for: Antibodies elicited by the first non-viral prophylactic cancer vaccine show tumor-specificity and immunotherapeutic potential
Source: PubMed Central journal article supplement (PMC4992835; doi:10.1038/srep31740), 2016-08-22
Supplement: srep31740-s1.pdf [file srep31740-s1.pdf]

# Supplementary Information:

## **Antibodies elicited by the first non-viral prophylactic cancer vaccine show tumor-specificity and immunotherapeutic potential**

Jason J. Lohmueller<sup>1,a</sup>, Shuji Sato<sup>2,a</sup>, Lana Popova<sup>2</sup>, Isabel M. Chu<sup>2</sup>, Meghan A. Tucker<sup>2</sup>, Roberto Barberena<sup>2</sup>, Gregory M. Innocenti<sup>2</sup>, Mare Cudic<sup>3</sup>, James D. Ham<sup>1,4</sup>, Wan Cheung Cheung<sup>2,b</sup>, Roberto D. Polakiewicz<sup>2,\*</sup>, Olivera J. Finn<sup>1,\*</sup>

### **Affiliations:**

<sup>1</sup>University of Pittsburgh School of Medicine, Department of Immunology, Pittsburgh, PA USA

<sup>2</sup>Cell Signaling Technology, Inc., Danvers, Massachusetts, USA.

<sup>3</sup>Florida Atlantic University, Department of Chemistry and Biochemistry, Boca Raton, Florida, USA.

<sup>4</sup>Carnegie Mellon University, Department of Biomedical Engineering, Pittsburgh, PA.

<sup>a</sup>These authors contributed equally to this work.

<sup>b</sup>Current address: Global Biotherapeutic Technologies, Pfizer, Cambridge, Massachusetts 02139, USA.

\*To whom correspondence should be addressed.

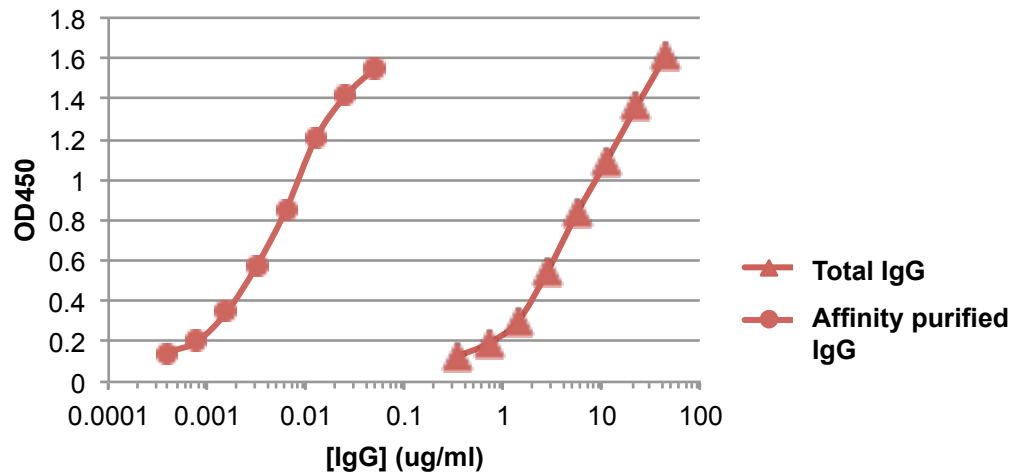

**Supplementary Fig. 1. Specific activity of total plasma IgG and affinity purified IgG from donor binding to 100mer VNTR peptide as determined by ELISA.** Anti-MUC1 vaccine peptide IgG in the plasma of the vaccinee was affinity purified first by protein A purification of total IgG then on 100mer VNTR peptide immobilized to magnetic beads. The specific binding activity of the eluted IgG after protein A purification (total IgG) and after peptide affinity purification (affinity purified IgG) was tested by ELISA.

**Supplementary Table 1. Antibody VDJ and VJ usage and the number of somatic hypermutations for the heavy (Hc SHM) and light (Lc SHM) chains of the human anti-MUC1 antibodies.**

| <b>Mab</b>     | <b>VDJ</b>        | <b>Hc SHM</b> | <b>VJ</b>  | <b>Lc SHM</b> |
|----------------|-------------------|---------------|------------|---------------|
| <b>H4/K10</b>  | VH4-39;DH1-26;JH5 | 3             | VK4-1;JK3  | 1             |
| <b>H4/K11</b>  | VH4-39;DH1-26;JH5 | 3             | VK4-1;JK2  | 0             |
| <b>H7/L1</b>   | VH4-39;DH3-10;JH6 | 5             | VL1-40;JL2 | 1             |
| <b>H9/K4</b>   | VH3-66;DH3-22;JH3 | 0             | VK2-28;JK2 | 7             |
| <b>H14/K6</b>  | VH3-11;DH2-15;JH6 | 3             | VK2-24;JK4 | 0             |
| <b>H15/K6</b>  | VH3-11;DH2-8;JH6  | 3             | VK2-24;JK4 | 0             |
| <b>H16/K6</b>  | VH3-11;DH2-15;JH6 | 3             | VK2-24;JK4 | 0             |
| <b>H16/K16</b> | VH3-11;DH2-15;JH6 | 3             | VK2-24;JK4 | 1             |
| <b>H17/K7</b>  | VH3-74;DH6-6;JH4  | 1             | VK2-30;JK1 | 3             |
| <b>H19/K6</b>  | VH3-11;DH2-15;JH6 | 2             | VK2-24;JK4 | 0             |
| <b>H19/K15</b> | VH3-11;DH2-15;JH6 | 2             | VK2-24;JK3 | 1             |
| <b>H21/K7</b>  | VH3-66;DH3-22;JH4 | 1             | VK2-30;JK1 | 3             |
| <b>H22/K7</b>  | VH3-53;DH3-16;JH6 | 1             | VK2-30;JK1 | 3             |

| MUC1 VNTR Glycopeptides    | Antibodies |       |      |      |       |       |       |        |       |        |       |       |     |     |
|----------------------------|------------|-------|------|------|-------|-------|-------|--------|-------|--------|-------|-------|-----|-----|
|                            | H4K10      | H4K11 | H7L1 | H9K4 | H14K6 | H15K6 | H16K6 | H16K16 | H17K7 | H19K15 | H21K7 | H22K7 | 3C6 | 4H5 |
| (HGVTSAPDTRPAPGSTAPPA)x2   | 3.2        | 3.4   | 3.1  | 3.5  | 3.0   | 2.9   | 2.9   | 3.3    | 2.8   | 3.3    | 3.0   | 3.1   | 2.3 | 2.5 |
| HGVTSAPDTRPAPGSTAPPA       | 0.1        | 0.1   | 0.1  | 0.1  | 2.1   | 2.0   | 2.1   | 2.2    | 1.9   | 2.4    | 2.1   | 2.1   | 1.5 | 1.9 |
| HGVTSAPDTRPAPGSTAPPA       | 0.1        | 0.1   | 0.1  | 0.1  | 1.6   | 1.7   | 1.6   | 0.1    | 2.0   | 1.5    | 2.1   | 2.2   | 2.0 | 1.8 |
| HGVTSAPDTRPAPGSTAPPA       | 0.1        | 0.1   | 0.1  | 0.1  | 2.1   | 2.4   | 2.1   | 1.3    | 2.1   | 2.7    | 2.1   | 2.2   | 2.0 | 1.8 |
| HGVTSAPDIRPAPGSTAPPA       | 0.1        | 0.1   | 0.1  | 0.1  | 0.1   | 0.2   | 0.1   | 0.1    | 1.9   | 0.1    | 2.1   | 2.3   | 2.4 | 0.1 |
| HGVTSAPDTRPAPGSIAPPA       | 0.1        | 0.1   | 0.1  | 0.1  | 2.5   | 2.5   | 2.4   | 2.2    | 0.1   | 2.5    | 0.1   | 0.1   | 1.5 | 1.9 |
| HGVTSAPDIRPAPGSTAPPA       | 0.1        | 0.1   | 0.1  | 0.1  | 0.1   | 0.1   | 0.1   | 0.1    | 1.9   | 0.1    | 2.2   | 2.3   | 2.4 | 0.1 |
| HGVTSAPDIRPAPGSIAPPA       | 0.1        | 0.1   | 0.1  | 0.1  | 0.1   | 0.2   | 0.1   | 0.1    | 0.1   | 0.1    | 0.1   | 0.1   | 2.4 | 0.1 |
| Bovine Serum Albumin (BSA) | 0.1        | 0.1   | 0.1  | 0.1  | 0.1   | 0.1   | 0.1   | 0.1    | 0.1   | 0.1    | 0.1   | 0.1   | 0.2 | 0.1 |

**Supplementary Fig. 2. Binding of antibodies to MUC1 glycopeptides.** ELISAs were performed on plates coated with various MUC1 glycopeptides or BSA for each anti-MUC1 antibody. Glycosylated residues on the glycopeptides are highlighted in red. Absorbance values for each peptide/antibody combination are displayed in the heatmap. Two mouse antibodies that bind to either all MUC1 glycoforms (3C6) or only the tumor specific glycoforms (4H5) were used as controls.

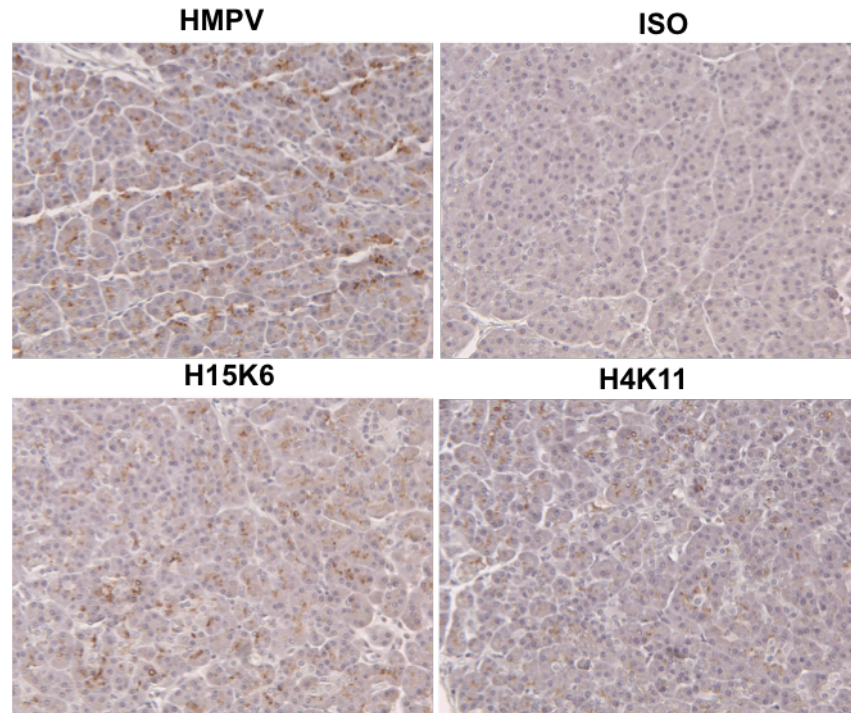

**Supplementary Fig. 3. Immunohistochemical staining of pancreatic acinar cells with human anti-MUC1 antibodies.** Paraffin-embedded normal pancreas tissue sections were stained with HMPV antibody for total MUC1 expression, human IgG Isotype control antibody as a negative control, and human anti-MUC1 antibodies H15K6, and H4K11. Punctate staining is indicative of subcellular compartment staining. Images taken at 20X magnification.

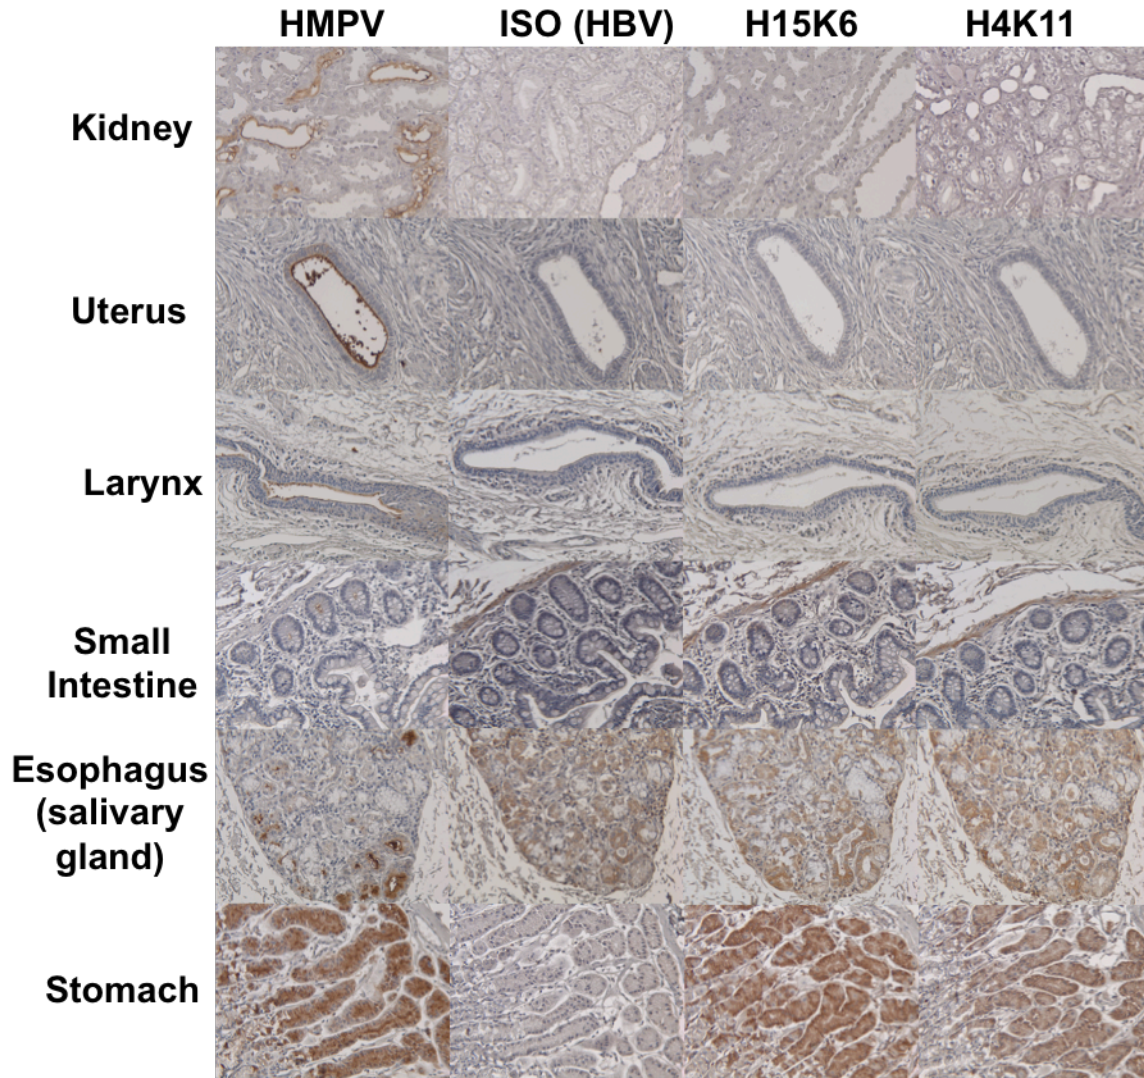

**Supplementary Fig. 4. Immunohistochemical staining of paraffin-embedded normal tissue sections with human anti-MUC1 antibodies H15K6 and H4K11. HMPV is a mouse antibody that stains all MUC1 glycoforms (positive control). ISO (HBV) is a human anti-HBV IgG used as an isotype (negative) control. Images taken at 20X magnification.**

**Supplementary Table 2. Tumor and normal tissue sample information for stained tissue samples.**

| <u>Catalog ID#</u> | <u>Vendor</u> | <u>Tissue type</u>                      | <u>Age</u> | <u>Sex</u> |
|--------------------|---------------|-----------------------------------------|------------|------------|
| HUCAT171           | US BIOMAX     | Adenocarcinoma (grade II) of pancreas   | 54         | F          |
| HUCAT171           | US BIOMAX     | Adenocarcinoma (grade II) of pancreas   | 54         | F          |
| HUCAT226           | US BIOMAX     | Adenocarcinoma (grade II) of right lung | 42         | M          |
| HUCAT226           | US BIOMAX     | Adenocarcinoma (grade II) of right lung | 42         | M          |
| HUCAT300           | US BIOMAX     | Human breast invasive ductal carcinoma  | 47         | F          |
| HUCAT300           | US BIOMAX     | Human breast invasive ductal carcinoma  | 47         | F          |
| HUCAT391           | US BIOMAX     | Human Kidney Cancer                     | 57         | F          |
| HUCAT391           | US BIOMAX     | Human Kidney Cancer                     | 57         | F          |
| HUFPT041           | US BIOMAX     | Normal Human Esophagus                  | 21         | F          |
| HUFPT041           | US BIOMAX     | Normal Human Esophagus                  | 21         | F          |
| HUFPT073           | US BIOMAX     | Normal Human Kidney Medulla             | 59         | M          |
| HUFPT073           | US BIOMAX     | Normal Human Kidney Medulla             | 59         | M          |
| HUFPT078           | US BIOMAX     | Normal Human Body Of Pancreas           | 63         | M          |
| HUFPT078           | US BIOMAX     | Normal Human Body Of Pancreas           | 63         | M          |
| HUFPT081           | US BIOMAX     | Normal Human Small Intestine            | 2          | F          |
| HUFPT081           | US BIOMAX     | Normal Human Small Intestine            | 2          | F          |
| HUFPT096           | US BIOMAX     | Normal Human Uterus                     | 21         | F          |
| HUFPT096           | US BIOMAX     | Normal Human Uterus                     | 21         | F          |
| HUFPT101           | US BIOMAX     | Normal Human Tongue                     | 21         | F          |
| HUFPT101           | US BIOMAX     | Normal Human Tongue                     | 21         | F          |
| HUFPT116           | US BIOMAX     | Normal Human Larynx                     | 21         | F          |
| HUFPT116           | US BIOMAX     | Normal Human Larynx                     | 21         | F          |
| HUFPT130           | US BIOMAX     | Normal Breast Tissue                    | 35         | F          |
| HUFPT130           | US BIOMAX     | Normal Breast Tissue                    | 35         | F          |
| HUFPT178           | US BIOMAX     | Normal Lung                             | 47         | M          |
| HUFPT178           | US BIOMAX     | Normal Lung                             | 47         | M          |
| Colon N.434        | CST           | Normal Colon                            | #N/A       | #N/A       |
| Colon N.434        | CST           | Normal Colon                            | #N/A       | #N/A       |
| Colon N.434        | CST           | Normal Colon                            | #N/A       | #N/A       |
| Colon N.434        | CST           | Normal Colon                            | #N/A       | #N/A       |
| Colon 433          | CST           | Colon Adenocarcinoma                    | #N/A       | #N/A       |
| Colon 433          | CST           | Colon Adenocarcinoma                    | #N/A       | #N/A       |
| Colon 433          | CST           | Colon Adenocarcinoma                    | #N/A       | #N/A       |

|            |          |                      |      |      |
|------------|----------|----------------------|------|------|
| Colon 433  | CST      | Colon Adenocarcinoma | #N/A | #N/A |
| Lung N.947 | CST      | Normal Lung          | #N/A | #N/A |
| Lung N.947 | CST      | Normal Lung          | #N/A | #N/A |
| Lung N.947 | CST      | Normal Lung          | #N/A | #N/A |
| Lung N.947 | CST      | Normal Lung          | #N/A | #N/A |
| Lung 946   | CST      | Lung Adenocarcinoma  | #N/A | #N/A |
| Lung 946   | CST      | Lung Adenocarcinoma  | #N/A | #N/A |
| Lung 946   | CST      | Lung Adenocarcinoma  | #N/A | #N/A |
| Lung 946   | CST      | Lung Adenocarcinoma  | #N/A | #N/A |
| Stomach    | BioChain | Normal Stomach       | #N/A | #N/A |
| Stomach    | BioChain | Normal Stomach       | #N/A | #N/A |

Vendor catalogue number, vendor, tissue sample type, and patient age and sex are listed for each of the tissues stained. “#N/A” indicates that this information was not readily available for the particular sample.



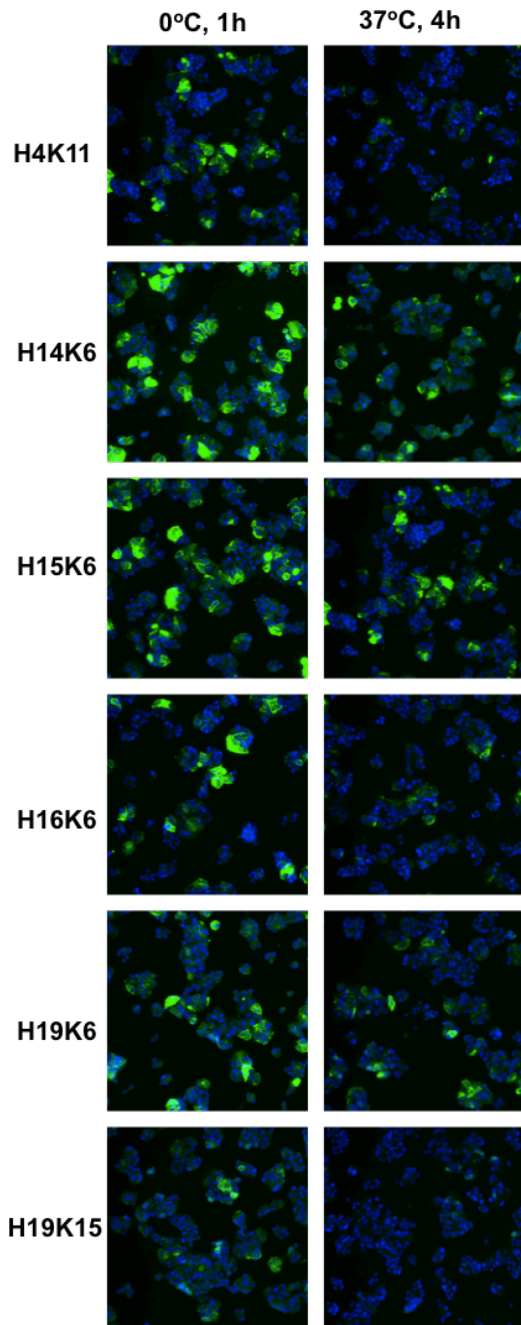

**Supplementary Fig. 5. Immunofluorescence staining of MUC1 internalization following binding of human anti-MUC1 antibodies.** Punctate staining is seen with H15K6 and not with the other antibodies. ZR-75-1 cells were incubated with various anti-MUC1 human antibodies for the indicated times and temperatures. Cells were then washed and fixed with

paraformaldehyde followed by detection with secondary antibodies. MUC1: anti-human IgG-Alexa 488 complexes are shown in green. Nuclei were stained with DAPI (blue).

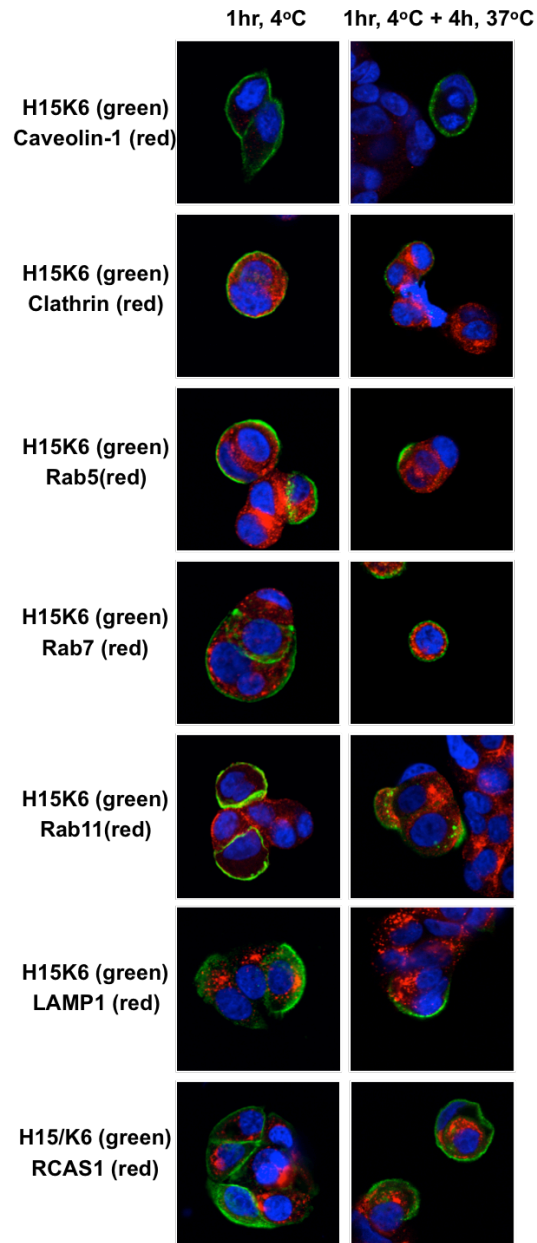

**Supplementary Fig. 6. Confocal images of MUC1 internalization after binding of H15K6**

**and colocalization with indicated intracellular compartment markers.** ZR-75-1 cells were

incubated with anti-MUC1 human antibody H15K6 for the indicated times and temperatures.

Cells were then washed and fixed with paraformaldehyde, then incubated with rabbit antibodies specific for molecules in the endocytic pathway (Caveolin1, Clathrin, Rab5, Rab7, Rab11),

lysosome (LAMP1) or golgi (RCAS1), followed by detection with secondary antibodies (MUC1:

anti-human IgG-Alexa 488 complex is shown in green; organelle markers: anti-rabbit IgG-Alexa 555 complex is shown in red). Nuclei were stained with DAPI (blue). Signal was visualized by confocal immunofluorescence microscopy and captured images were overlaid to assess co-localization (yellow) of anti-MUC1 antibody with organelle marker antibody.

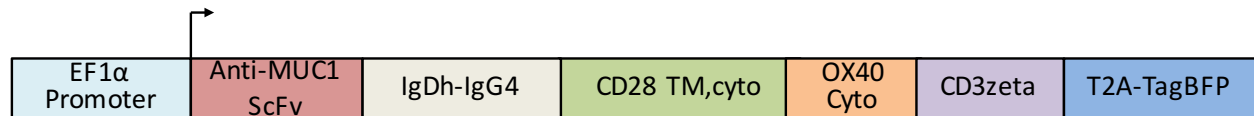

**Supplementary Fig. 7. Design of CAR Lentiviral Expression Cassettes.** CARs are expressed from the EF1 $\alpha$  promoter, and consist of the scFv's of the H4K10, H4K11, H14K6, H16K6 or H19K15 antibodies fused to the IgDhinge and IgG4(CH<sub>2</sub>,CH<sub>3</sub>) spacer domains, the CD28 transmembrane and cytoplasmic domains, the OX40 cytoplasmic domain, CD3zeta and the T2A cleavage tag, and the TagBFP reporter gene.

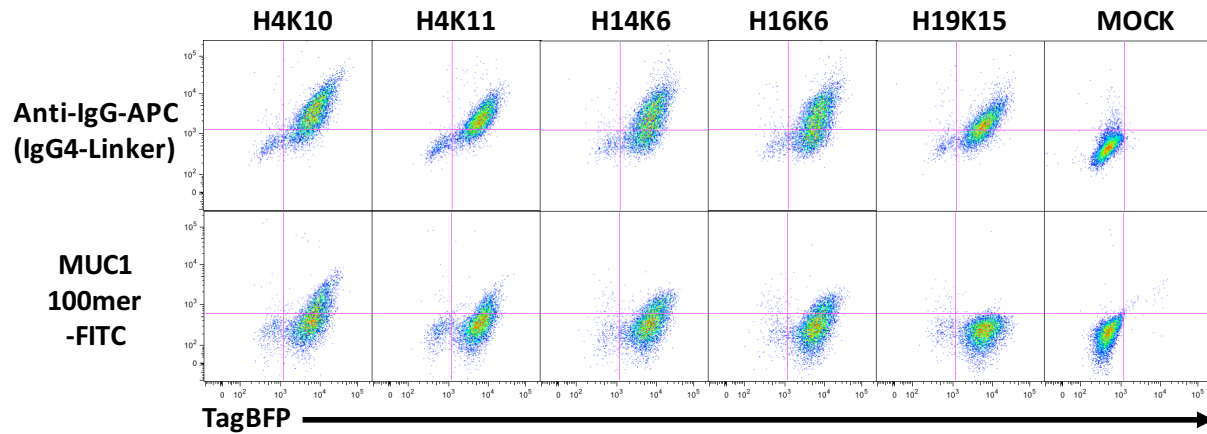

**Supplementary Fig. 8. Confirmation of CAR cell surface expression by Fc-APC staining of extracellular linker domain and FITC labeled MUC1-100mer peptide.** Flow sorted CAR+ cells (TagBFP+) or MOCK transduced negative control cells were stained with an anti-human IgG APC-conjugated F(ab')<sub>2</sub> to identify IgG4-linker expressing cells or FITC-labeled MUC1-100mer peptide indicating scFv binding to MUC1 peptide and evaluated by flow cytometry.

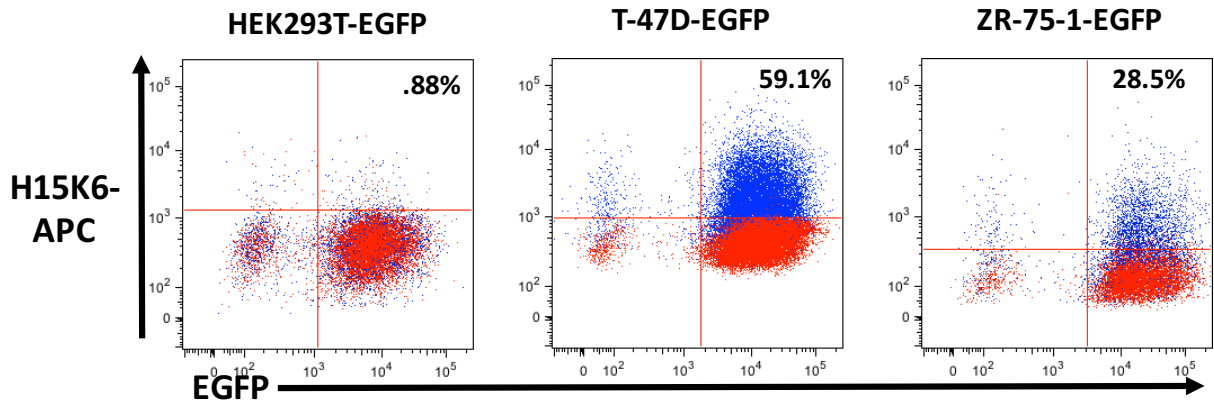

**Supplementary Fig. 9. Hypoglycosylated MUC1+ populations of HEK293T-EGFP, T-47D-EGFP, and ZR-75-1-EGFP target cells.** Cell lines were stained with H15K6 antibody followed by anti-human IgG APC-conjugated F(ab')<sub>2</sub> to identify the hypoglycosylated MUC1 population of each EGFP+ cell line and underwent flow cytometry. Percentage of double positive populations for APC (H15K6) and EGFP are listed in this gate for each line.

Supplementary Table 3. DNA sequences of anti-MUC1 CARs and expression vector.

| <i>3<sup>rd</sup> Generation CAR sequence for anti-MUC1 CARs</i> |       |
|------------------------------------------------------------------|-------|
| ATGGAGACAGACACACTCCTGCTATGGGTGCTGCTGCTCTGGGTTCAGGTTCCACA         | here- |
| GG-scFv                                                          |       |
| AAAGACGGGACAGCTACTACATGACAAGCAGCCAGCTCTCCACCCCCCTCCAGCAG         |       |
| TGGCGCCAAGGCGAGTACAAATGCGTGGTCCAGCACACCCGCCAGCAAGAGTAAGAA        |       |
| GGAGATCTTCCGCTGGCCAGAGTCTCAAAGGCACAGGCCTCCTCAGTGCCCCTGC          |       |
| ACAACCCCAAGCAGAGGGCAGCCTCGCCAAGGCAACCACAGCCCCAGCCACCACCC         |       |
| GTAACACAGGAAGAGGAGGAGAAGAGAAGAAGAAGGAGAAGGAGAAAGAGGAAC           |       |
| AAGAAGAGAGAGAGACAAAGACACCAGAGGAGAGCAAGTACGGCCCTCCCTGCC           |       |
| CCCTTGCCCTGCCCCCGAGTTCCTGGGCGGACCCAGCGTGTTCCTGTTCCCCCCAA         |       |
| GCCCAAGGACACCCTGATGATCAGCCGGACCCCGAGGTGACCTGCGTGGTGGTGG          |       |
| ACGTGAGCCAGGAAGATCCCGAGGTCCAGTTCAATTGGTACGTGGACGGCGTGGAA         |       |
| GTGCACAACGCCAAGACCAAGCCCAGAGAGGAACAGTTCAACAGCACCTACCGGGT         |       |
| GGTGTCTGTGCTGACCGTGTGCACCAGGACTGGCTGAACGGCAAAGAATACAAGT          |       |
| GCAAGGTGTCCAACAAGGGCCTGCCAGCAGCATCGAAAAGACCATCAGCAAGGCC          |       |
| AAGGGCCAGCCTCGCGAGCCCCAGGTGTACACCCTGCCTCCCTCCCAGGAAGAGAT         |       |
| GACCAAGAACCAGGTGTCCCTGACCTGCCTGGTGAAGGGCTTCTACCCAGCGACA          |       |
| TCGCCGTGGAGTGGGAGAGCAACGGCCAGCCTGAGAACAACACTACAAGACCACCCT        |       |
| CCCGTGTGGACAGCGACGGCAGCTTCTTCTGTACAGCCGGCTGACCGTGGACAA           |       |
| GAGCCGGTGGCAGGAAGGCAACGTCTTTAGCTGCAGCGTGATGCACGAGGCCCTGC         |       |
| ACAACCACTACACCAGAAGAGCCTGAGCCTGTCCCTGGGCAAGATGTTCTGGGTG          |       |
| CTGGTGGTGGTGGGCGGGGTGCTGGCCTGCTACAGCCTGCTGGTGACAGTGGCCTTC        |       |
| ATCATCTTTTGGGTGCGGAGCAAGCGGAGCAGAGGCGGCCACAGCGACTACATGAA         |       |
| CATGACCCCCAGACGGCCTGGCCCCACCCGGAAGCACTACCAGCCCTACGCCCCAC         |       |
| CCAGGGACTTTGCCGCTACCGGTCCGGCGGAGGGCAGAGGCTGCCCCCCGATGCC          |       |
| CACAAGCCCCCTGGGGGAGGCAGTTTCCGGACCCCCATCCAAGAGGAGCAGGCCGA         |       |
| CGCCCCTCCACCCTGGCCAAGATCCGGGTGAAGTTCAGCAGAAGCGCCGACGCC           |       |
| CTGCCTACCAGCAGGGCCAGAATCAGCTGTACAACGAGCTGAACCTGGGCAGAAGG         |       |
| GAAGAGTACGACGTCTTGATAAGCGGAGAGGCCGGGACCCTGAGATGGGCGGCA           |       |
| AGCCTCGGCGGAAGAACCCCCAGGAAGGCCTGTATAACGAACTGCAGAAAGACAA          |       |
| GATGGCCGAGGCCTACAGCGAGATCGGCATGAAGGGCGAGCGGAGGCGGGGCAAG          |       |
| GGCCACGACGGCCTGTATCAGGGCCTGTCCACCGCCACCAAGGATACCTACGACGC         |       |
| CCTGCACATGCAGGCCCTGCCCCCAAGGCTCGAGGGCGGCGGAGAGGGCAGAGGA          |       |
| AGTCTTCTAACATGCGGTGACGTGGAGGAGAATCCCGGCCCTCGCATGAGCGAGCT         |       |
| GATTAAGGAGAACATGCACATGAAGCTGTACATGGAGGGCACCGTGGACAACCATC         |       |
| ACTTCAAGTGCACATCCGAGGGCGAAGGCAAGCCCTACGAGGGCACCCAGACCATG         |       |
| AGAATCAAGGTGGTTCGAGGGCGGCCCTCTCCCCTTCGCCTTCGACATCCTGGCTACT       |       |
| AGCTTCTCTACGGCAGCAAGACCTTCATCAACCACACCCAGGGCATCCCCGACTTC         |       |
| TTCAAGCAGTCTTCCCTGAGGGCTTCACATGGGAGAGAGTCAACACATAACGAAGA         |       |
| CGGGGGCGTGTGACCGCTACCCAGGACACCAGCCTCCAGGACGGCTGCCTCATCT          |       |
| ACAACGTCAAGATCAGAGGGGTGAACTTCACATCCAACGGCCCTGTGATGCAGAAG         |       |
| AAAACACTCGGCTGGGAGGCCTTACCAGACGCTGTACCCCGCTGACGGCGGCCT           |       |
| GGAAGGCAGAAACGACATGGCCCTGAAGCTCGTGGGCGGGAGCCATCTGATCGCAA         |       |
| ACATCAAGACCACATATAGATCCAAGAAACCCGCTAAGAACCTCAAGATGCCTGGC         |       |
| GTCTACTATGTGGACTACAGACTGGAAAGAATCAAGGAGGCCAACAACGAAACATA         |       |



CGTCGAGCAGCACGAGGTGGCAGTGGCCAGATACTGCGACCTCCCTAGCAAACCTGG  
GGCACAAGCTTAATTAA

**Color code:**

Leader sequence

IgDhinge

IgG4(CH<sub>2</sub>,CH<sub>3</sub>)

CD28-TM<sub>cyto</sub>

OX40-cyto

CD3zeta

T2A-TagBFP

*scFv DNA sequences (V<sub>H</sub>-GS Linker-V<sub>L</sub>)*

**H4K10**

CAGCTGCAGCTGCAGGAGTCGGGCCCAGGACTGGTGAAGCCTTCGGAGACCCTGTC  
CCTCACCTGCACTGTCTCTGGTGGCTCCATCAGCAGTAGTCGTTACTACTGGGGCTG  
GATCCGCCAGCCCCAGGGAAGGGGCTGGAGTGGATTGGGAGTATCTATTATAGTG  
GGAGCACCTACTACAACCCGTCCCTCAAGAGTCGAGTCACCATATCCGTAGACACGT  
CCAACAACCAGTTCTCCCTGAAGCTGACCTCTGTGACCGCCGCAGACACGGCTGTGT  
ATTACTGTGCGAGACTCCCCGAAAGTGGGGGCTACTCGGGGTGGTTCGACCCCTGGG  
GCCAGGGAACCCTGGTCACCGTCTCCTCAGGCGGTGGGAGCGGTGGTGGCTCCGGG  
GGCGGTTCCGGTGGGGGCGGCAGCAGCGACATCGTGATGACCCAGTCTCCAGACTC  
CCTGGCTGTGTCTCTGGGCGAGAGGGCCACCATCAACTGCAAGTCCAGCCAGAGTG  
TTTTATACAGCTCCAACAATAAGAACTACTTAGCTTGGTACCAGCAGAAACCAGGAC  
AGCCTCCTAAGCTGCTCATTTATTGGGCATCTACCCGGGAATCCGGGGTCCCTGACC  
GATTCAGTGGCAGCGGGTCTGGGACAGATTTCACTCTCACCATCAGCAGCCTGCAGG  
CTGAAGATGTGGCAGTTTATTACTGTGAGCAATATTATAAATACTCCATTCACTTTCGG  
CCCTGGGACCAAAGTGGAATCAAA

**H4K11**

CAGCTGCAGCTGCAGGAGTCGGGCCCAGGACTGGTGAAGCCTTCGGAGACCCTGTC  
CCTCACCTGCACTGTCTCTGGTGGCTCCATCAGCAGTAGTCGTTACTACTGGGGCTG  
GATCCGCCAGCCCCAGGGAAGGGGCTGGAGTGGATTGGGAGTATCTATTATAGTG  
GGAGCACCTACTACAACCCGTCCCTCAAGAGTCGAGTCACCATATCCGTAGACACGT  
CCAACAACCAGTTCTCCCTGAAGCTGACCTCTGTGACCGCCGCAGACACGGCTGTGT  
ATTACTGTGCGAGACTCCCCGAAAGTGGGGGCTACTCGGGGTGGTTCGACCCCTGGG  
GCCAGGGAACCCTGGTCACCGTCTCCTCAGGCGGTGGGAGCGGTGGTGGCTCCGGG  
GGCGGTTCCGGTGGGGGCGGCAGCAGCGACATCGTGATGACCCAGTCTCCAGACTC  
CCTGGCTGTGTCTCTGGGCGAGAGGGCCACCATCAACTGCAAGTCCAGCCAGAGTG  
TTTTATACAGCTCCAACAATAAGAACTACTTAGCTTGGTACCAGCAGAAACCAGGAC  
AGCCTCCTAAGCTGCTCATTTACTGGGCATCTACCCGGGAATCCGGGGTCCCTGACC  
GATTCAGTGGCAGCGGGTCTGGGACAGATTTCACTCTCACCATCAGCAGCCTGCAGG

CTGAAGATGTGGCAGTTTATTACTGTCAGCAATATTATAGTACTCCGTTCACTTTTGG  
CCAGGGGACCAAACCTGGAGATCAAT

**H14K6**

CAGGTGCAGCTGGTGGAGTCTGGGGGAGGCTTGGTCAAGCCTGGAGGGTCCCTGAG  
ACTCTCCTGTGCAGCCTCTGGATTCACCTTCAGTGACTACTACATGAGCTGGATCCG  
CCAGGCTCCAGGGAAGGGGCTGGAGTGGGTTTCATACATTAGTAGTAGTGGTACTA  
CCAAATACTACGCAGACTCTGTGAAGGGCCGATTCACCATCTCCAGGGACAACGCC  
AAGAACTCACTGTATCTGCAAATGAACAGCCTGAGAGCCGAGGACACGGCCGTGTA  
TTACTGTGTGAGAGAGAATTTAGGATACTGTAGTGGTGGTAGCTGCTACTACTACTA  
CTACATGGACGTCTGGGGCAAAGGGACCACGGTCACCGTCTCCTCAGGCCGTGGGA  
GCGGTGGTGGCTCCGGGGGCGGTTCCGGTGGGGGCGGCAGCAGCGATATTGTGATG  
ACCCAGACTCCACTCTCCTCACCTGTCACCCTTGGACAGCCGGCCTCCATCTCCTGC  
AGGTCTAGTCAAAGCCTCGTACACAGTGATGGAAACACCTACTTGAGTTGGCTTCAG  
CAGAGGCCAGGCCAGCCTCCAAGACTCCTAATTTATAAGATTTCTAACCGGTTCTCT  
GGGGTCCCAGACAGATTCAGTGGCAGTGGGGCAGGGACAGATTTCACTGAAAAT  
CAGCAGGGTGGAAAGCTGAGGATGTCGGGGTTTATTACTGCATGCAAGCTACACAAT  
TTCTCTCACTTTCGGCGGAGGGACCAAGGTGGAGATCAA

**H16K6**

CAGGTGCAGCTGGTGGAGTCTGGGGGAGGCTTGGTCAAGCCTGGAGGGTCCCTGAG  
ACTCTCCTGTGCAGCCTCTGGATTCACCTTCAGTGACTACTACATGAGCTGGATCCG  
CCAGGCTCCAGGGAAGGGGCTGGAGTGGGTTTCATACATTAGTAGTAGTGGTACTA  
CCAAATACTACGCAGACTCTGTGAAGGGCCGATTCACCATCTCCAGGGACAACGCC  
AAGAACTCACTGTATCTGCAAATGAACAGCCTGAGAGCCGAGGACACGGCCGTGTA  
TTACTGTGTGAGAGAGAATTTAGGATACTGTAGTGGTGGGAGCTGCTTCTACTACTA  
CTACATGGACGTCTGGGGCAAAGGGACCACGGTCACCGTCTCCTCAGGCCGTGGGA  
GCGGTGGTGGCTCCGGGGGCGGTTCCGGTGGGGGCGGCAGCAGCGATATTGTGATG  
ACCCAGACTCCACTCTCCTCACCTGTCACCCTTGGACAGCCGGCCTCCATCTCCTGC  
AGGTCTAGTCAAAGCCTCGTACACAGTGATGGAAACACCTACTTGAGTTGGCTTCAG  
CAGAGGCCAGGCCAGCCTCCAAGACTCCTAATTTATAAGATTTCTAACCGGTTCTCT  
GGGGTCCCAGACAGATTCAGTGGCAGTGGGGCAGGGACAGATTTCACTGAAAAT  
CAGCAGGGTGGAAAGCTGAGGATGTCGGGGTTTATTACTGCACGCAAGCTACACAAT  
TCCCCCTCACTTTCGGCGGAGGGACCAAGGTGGAGATCAA

**H19K15**

CAGGTGCAGCTGGTGGAGTCTGGGGGAGGCTTGGTCAAGCCTGGAGGGTCCCTGAG  
ACTCTCCTGTGCAGCCTCTGGATTCACCTTCAGTGACTACTACATGAGCTGGATCCG  
CCAGGCTCCAGGGAAGGGGCTGGAGTGGGTTTCATACATTAGTAGTAGTGGTACTA  
CCAAATACTACGCAGACTCTGTGAAGGGCCGATTCACCATCTCCAGGGACAACGCC  
AAGAACTCACTGTATCTGCAAATGAACAGCCTGAGAGCCGAGGACACGGCCGTGTA  
TTACTGTGCGAGAGAACGAATAGGATACTGTAGTGGTGGGAGCTGCTTCTACTACTA  
CTACATGGACGTCTGGGGCAAAGGGACCACGGTCACCGTCTCCTCAGGCCGTGGGA  
GCGGTGGTGGCTCCGGGGGCGGTTCCGGTGGGGGCGGCAGCAGCGATATTGTGATG  
ACCCAGACTCCACTCTCCTCACCTGTCACCCTTGGACAGCCGGCCTCCATCTCCTGC  
AGGTCTAGTCAAAGCCTCGTACACAGTGATGGAAACACCTACTTGAGTTGGCTTCAG

CAGAGGCCAGGCCAGCCTCCAAGACTCCTAATTTATAAGATTTCTAACCGGTTCTCT  
GGGGTCCCAGACAGATTCAGTGGCAGTGGGGCAGGGACAGATTCACACTGAAAAT  
CAGCAGGGTGGAAAGCTGAGGATGTCGGGGTTTATTACTGCACGCAAGCTACACAAT  
TTCCCATCACTTTCGGCCCTGGGACCAAAGTGGATATCAAA

*pSICO-EF1 Lentiviral-expression vector*

GTCGACGGATCGGGAGATCTCCCGATCCCCTATGGTGCACCTCTCAGTACAATCTGCT  
CTGATGCCGCATAGTTAAGCCAGTATCTGCTCCCTGCTTGTGTGTTGGAGGTCGCTG  
AGTAGTGCGCGAGCAAAATTTAAGCTACAACAAGGCAAGGCTTGACCGACAATTGC  
ATGAAGAATCTGCTTAGGGTTAGGCGTTTTGCGCTGCTTCGCGATGTACGGGCCAGA  
TATACGCGTTGACATTGATTATTGACTAGTTATTAATAGTAATCAATTACGGGGTCA  
TTAGTTCATAGCCCATATATGGAGTTCGCGGTTACATAACTTACGGTAAATGGCCCG  
CCTGGCTGACCGCCCAACGACCCCGCCCATGACGTCAATAATGACGTATGTTCCC  
ATAGTAACGCCAATAGGGACTTTCATTGACGTCAATGGGTGGAGTATTTACGGTAA  
ACTGCCCACTTGGCAGTACATCAAGTGTATCATATGCCAAGTACGCCCCCTATTGAC  
GTCAATGACGGTAAATGGCCCGCTGGCATTATGCCCAGTACATGACCTTATGGGAC  
TTTCTACTTGGCAGTACATCTACGTATTAGTCATCGCTATTACCATGGTGTATGCGGT  
TTTGGCAGTACATCAATGGGCGTGGATAGCGGTTTACTCACGGGGATTTCCAAGTC  
TCCACCCCATGACGTCAATGGGAGTTTGTGTTTGGCACCAAAATCAACGGGACTTTC  
CAAAATGTCGTAACAACCTCCGCCCCATTGACGCAAAATGGGCGGTAGGCGTGTACGG  
TGGGAGGTCTATATAAGCAGCGGTTTTGCCTGTACTGGGTCTCTCTGGTTAGACCA  
GATCTGAGCCTGGGAGCTCTCTGGCTAACTAGGGAACCCACTGCTTAAGCCTCAATA  
AAGCTTGCCTTGAGTGCTTCAAGTAGTGTGTGCCCGTCTGTTGTGTGACTCTGGTAAC  
TAGAGATCCCTCAGACCCTTTTAGTCAGTGTGGAAAATCTCTAGCAGTGGCGCCCGA  
ACAGGGACTTGAAAGCGAAAGGGAAACCAGAGGAGCTCTCTCGACGCAGGACTCG  
GCTTGCTGAAGCGCGCACGGCAAGAGGGCGAGGGGCGGCGACTGGTGAGTACGCCA  
AAAATTTTGACTAGCGGAGGCTAGAAGGAGAGAGATGGGTGCGAGAGCGTCAGTAT  
TAAGCGGGGGAGAATTAGATCGCGATGGGAAAAAATTCGGTTAAGGCCAGGGGGA  
AAGAAAAAATATAAATTAACACATATAGTATGGGCAAGCAGGGAGCTAGAACGATT  
CGCAGTTAATCCTGGCCTGTTAGAAACATCAGAAGGCTGTAGACAAATACTGGGAC  
AGCTACAACCATCCCTTCAGACAGGATCAGAAGAAGTCTAGATCATTATATAATACAG  
TAGCAACCCTCTATTGTGTGCATCAAAGGATAGAGATAAAAGACACCAAGGAAGCT  
TTAGACAAGATAGAGGAAGAGCAAAACAAAAGTAAGACCACCGCACAGCAAGCGG  
CCG GCCGCGCTGATCTTCAGACCTGGAGGAGGAGATATGAGGGACAATTGGAGAAG  
TGAATTATATAAATATAAAGTAGTAAAAATTGAACCATTAGGAGTAGCACCCACCA  
AGGCAAAGAGAAGAGTGGTGCAGAGAGAAAAAAGAGCAGTGGGAATAGGAGCTTT  
GTTCCCTTGGGTTCTTGGGAGCAGCAGGAAGCACTATGGGCGCAGCGTCAATGACGCT  
GACGGTACAGGCCAGACAATTATTGTCTGGTATAGTGCAGCAGCAGAACAATTTGCT  
GAGGGCTATTGAGGCGCAACAGCATCTGTTGCAACTCACAGTCTGGGGCATCAAGC  
AGCTCCAGGCAAGAATCCTGGCTGTGGAAAGATACCTAAAGGATCAACAGCTCCTG  
GGGATTTGGGGTTGCTCTGGAAAACCTATTTGCACCACTGCTGTGCCTTGGAAATGCT  
AGTTGGAGTAATAAATCTCTGGAACAGATTTGGAATCACACGACCTGGATGGAGTG  
GGACAGAGAAATTAACAATTACACAAGCTTAATACACTCCTTAATTGAAGAATCGC  
AAAACCAGCAAGAAAAGAATGAACAAGAATTATTGGAATTAGATAAATGGGCAAG  
TTTGTGGAATTGGTTTAAACATAACAAATTGGCTGTGGTATATAAATTTATTCATAAT  
GATAGTAGGAGGCTTGGTAGGTTTAAAGAATAGTTTTTGTCTGACTTTCTATAGTGAA

TAGAGTTAGGCAGGGATATTCACCATTATCGTTTCAGACCCACCTCCCAACCCCGAG  
GGGACCCGACAGGCCCGAAGGAATAGAAGAAGAAGGTGGAGAGAGAGACAGAGAC  
AGATCCATTCGATTAGTGAACGGATCGGCACTGCGTGCGCCAATTCTGCAGACAAAT  
GGCAGTATTCATCCACAATTTTAAAAGAAAAGGGGGGATTGGGGGGTACAGTGCAG  
GGGAAAGAATAGTAGACATAATAGCAACAGACATACAAATAAAGAATTACAAA  
ACAAATTACAAAATTCAAATTTTCGGGTTTATTACAGGGACAGCAGAGATCCAGT  
TTGGTTAGTACCGGGCCCGCTCTAGCCGTGAGGCTCCGGTGCCCGTCAGTGGGCAGA  
GCGCACATCGCCACAGTCCCCGAGAAGTTGGGGGGAGGGGTCCGGCAATTGAACCG  
GTGCCTAGAGAAGGTGGCGCGGGGTAAACTGGGAAAGTGATGTCGTGTACTGGCTC  
CGCCTTTTTCCCGAGGGTGGGGGAGAACCGTATATAAGTGCAGTAGTCGCCGTGAAC  
GTTCTTTTTTCGAACGGGTTTGCCGCCAGAACACAGGTAAGTGCCGTGTGTGGTTCC  
CGCGGGCCTGGCCTCTTACGGGTTATGGCCCTTGCGTGCCTTGAATTACTTCCACCT  
GGCTGCAGTACGTGATTCTTGATCCCAGCTTCGGGTTGGAAGTGGGTGGGAGAGTT  
CGAGGCCTTGCCTTAAGGAGCCCCTTCGCCTCGTGCTTGAGTTGAGGCCTGGCCTG  
GGCGCTGGGGCCCGCGGTGCGAATCTGGTGGCACCTTCGCGCCTGTCTCGCTGCTT  
TCGATAAGTCTCTAGCCATTTAAAATTTTTGATGACCTGCTGCGACGCTTTTTTTCTG  
GCAAGATAGTCTTGTAATGCGGGCCAAGATCTGCACACTGGTATTTTCGGTTTTTGG  
GGCCGCGGGCGGCGACGGGGCCCGTGCCTCCAGCGCACATGTTCCGGCGAGGCGGG  
GCCTGCGAGCGCGGCCACCGAGAATCGGACGGGGGTAGTCTCAAGCTGGCCGGCCT  
GCTCTGGTGCCTGGCCTCGCGCCCGCGTGTATCGCCCCGCCCTGGGCGGCAAGGCTG  
GCCCGGTCCGGCACCAAGTTGCGTGAGCGGAAAGATGGCCGCTTCCCGGCCCTGCTGC  
AGGGAGCTCAAATGGAGGACGCGGCGCTCGGGAGAGCGGGCGGGTGAGTCACCC  
ACACAAAGGAAAAGGGCCTTCCGTCCTCAGCCGTCGCTTCATGTGACTCCACGGAG  
TACCGGGCGCCGTCCAGGCACCTCGATTAGTTCTCGAGCTTTTGGAGTACGTGCTCT  
TTAGGTTGGGGGAGGGGTTTTATGCGATGGAGTTTCCCCACACTGAGTGGGTGGAG  
ACTGAAGTTAGGCCAGCTTGGCACTTGATGTAATTCTCCTTGGAAATTTGCCCTTTTTG  
AGTTTGGATCTTGGTTCATTCTCAAGCCTCAGACAGTGGTTCAAAGTTTTTTTCTTCC  
ATTTACAGGTGTCGTGAGCGGCCGCTGAACTGAAATTCATCGACGTTAACTATTCTAGA  
GTACCCGGGCTAGGATCCTGTACAAGTAGCGGCCGCATAACTTCGTATAGTATAAAT  
TATACGAAGTTATAAGCCTTGTTAACGCGCGGTGACCCTCGAGGTCGACGGTATCGA  
TAAGCTCGCTTACGAGATCATGTTTAAAGGGTTCCGGTTCCACTAGGTACAATTCGA  
TATCAAGCTTATCGATAATCAACCTCTGGATTACAAAATTTGTGAAAGATTGACTGG  
TATTCTTAACTATGTTGCTCCTTTTACGCTATGTGGATACGCTGCTTTAATGCCTTGT  
ATCATGCTATTGCTTCCCGTATGGCTTTCATTTTCTCCTCCTTGTATAAATCCTGGTTG  
CTGTCTTTTATGAGGAGTTGTGGCCCGTTGTCAGGCAACGTGGCGTGGTGTGCACT  
GTGTTTGCTGACGCAACCCCACTGGTTGGGGCATTGCCACCACCTGTCAGCTCCTT  
TCCGGGACTTTCGCTTTCCTCCCTATTGCCACGGCGGAACTCATCGCCGCCTGCC  
TTGCCCGCTGCTGGACAGGGGCTCGGCTGTTGGGCACTGACAATTCCGTGGTGTGT  
CGGGGAAATCATCGTCCTTTCCTTGGCTGCTCGCCTGTGTTGCCACCTGGATTCTGCG  
CGGGACGTCTTCTGCTACGTCCCTTCGGCCCTCAATCCAGCGGACCTTCTTCCCGC  
GGCCTGCTGCCGGCTCTGCGGCCTTTCGCGTCTTCGCCTTCGCCCTCAGACGAGTC  
GGATCTCCCTTTGGGCCGCTCCCCGCATCGATACCGTCCGACCTCGATCGAGACCTA  
GAAAAACATGGAGCAATCACAAGTAGCAATACAGCAGCTACCAATGCTGATTGTGC  
CTGGCTAGAAGCACAAAGAGGAGGAGGAGGTGGGTTTTCCAGTCACACCTCAGGTAC  
CTTAAAGACCAATGACTTACAAGGCAGCTGTAGATCTTAGCCACTTTTTAAAAGAAA  
AGGGGGGACTGGAAGGGCTAATCACTCCCAACGAAGACAAGATATCCTTGATCTG

TGGATCTACACACACAAGGCTACTTCCCTGATTGGCAGAACTACACACCAGGGCC  
AGGGATCAGATATCCACTGACCTTTGGATGGTGCTACAAGCTAGTACCAGTTGAGCA  
AGAGAAGGTAGAAGAAGCCAATGAAGGAGAGAACACCCGCTTGTTACACCCTGTGA  
GCCTGCATGGGATGGATGACCCGGAGAGAGAAGTATTAGAGTGGAGGTTTGACAGC  
CGCCTAGCATTTCATCACATGGCCCCGAGAGCTGCATCCGGACTGTACTGGGTCTCTC  
TGGTTAGACCAGATCTGAGCCTGGGAGCTCTCTGGCTAACTAGGGAACCCACTGCTT  
AAGCCTCAATAAAGCTTGCCTTGAGTGCTTCAAGTAGTGTGTGCCCGTCTGTTGTGT  
GACTCTGGTAACTAGAGATCCCTCAGACCCTTTTAGTCAGTGTGGAAAATCTCTAGC  
AGCATGTGAGCAAAAGGCCAGCAAAAGGCCAGGAACCGTAAAAAGGCCGCGTTGC  
TGGCGTTTTTCCATAGGCTCCGCCCCCTGACGAGCATCAAAAAATCGACGCTCAA  
GTCAGAGGTGGCGAAACCCGACAGGACTATAAAGATAACCAGGCGTTTCCCCCTGGA  
AGCTCCCTCGTGCCTCTCCTGTTCCGACCCTGCCGTTACCGGATACCTGTCCGCCT  
TTCTCCCTTCGGGAAGCGTGGCGCTTTCTCATAGCTCACGCTGTAGGTATCTCAGTTC  
GGTGTAGGTCGTTTCGCTCCAAGCTGGGCTGTGTGCACGAACCCCCCGTTCAGCCCGA  
CCGCTGCGCCTTATCCGGTAACTATCGTCTTGAGTCCAACCCGGTAAGACACGACTT  
ATCGCCACTGGCAGCAGCCACTGGTAACAGGATTAGCAGAGCGAGGTATGTAGGCG  
GTGCTACAGAGTTCTTGAAGTGGTGGCCTAACTACGGCTACACTAGAAGAACAGTAT  
TTGGTATCTGCGCTCTGCTGAAGCCAGTTACCTTCGGAAAAAGAGTTGGTAGCTCTT  
GATCCGGCAAACAAACCACCGCTGGTAGCGGTGGTTTTTTTTGTTTGCAAGCAGCAGA  
TTACGCGCAGAAAAAAAGGATCTCAAGAAGATCCTTTGATCTTTTCTACGGGGTCTG  
ACGCTCAGTGGAACGAAAACCTCACGTAAAGGGATTTTGGTCATGAGATTATCAAAA  
AGGATCTTCACCTAGATCCTTTTAAATTA AAAATGAAGTTTTAAATCAATCTAAAGT  
ATATATGAGTAAACTTGGTCTGACAGTTACCAATGCTTAATCAGTGAGGCACCTATC  
TCAGCGATCTGTCTATTTTCGTTTATCCATAGTTGCCTGACTCCCCGTCGTGTAGATAA  
CTACGATACGGGAGGGCTTACCATCTGGCCCCAGTGCTGCAATGATACCGCGAGAC  
CCACGCTCACCGGCTCCAGATTTATCAGCAATAAACCAGCCAGCCGGAAGGGCCGA  
GCGCAGAAGTGGTCTGCAACTTTATCCGCCTCCATCCAGTCTATTAATTGTTGCCG  
GGAAGCTAGAGTAAGTAGTTCGCCAGTTAATAGTTTTGCGCAACGTTGTTGCCATTGC  
TACAGGCATCGTGGTGTACGCTCGTCGTTTGGTATGGCTTCATTCAGCTCCGGTTCC  
CAACGATCAAGGCGAGTTACATGATCCCCATGTTGTGCAAAAAAGCGGTTAGCTCC  
TTCGGTCCCTCCGATCGTTGTGAGAAGTAAGTTGGCCGCAGTGTTATCACTCATGGTT  
ATGGCAGCACTGCATAATTCTCTTACTGTCATGCCATCCGTAAGATGCTTTTCTGTGA  
CTGGTGAGTACTCAACCAAGTCATTCTGAGAATAGTGTATGCGGCGACCGAGTTGCT  
CTTGCCCGGCGTCAATACGGGATAATACCGCGCCACATAGCAGAACTTTAAAAGTG  
CTCATCATTGGAAAACGTTCTTTCGGGGCGAAAACCTCTCAAGGATCTTACCGCTGTTG  
AGATCCAGTTCGATGTAACCCACTCGTGCACCCAACCTGATCTTCAGCATCTTTTACTT  
TCACCAGCGTTTCTGGGTGAGCAAAAACAGGAAGGCAAAAATGCCGCAAAAAGGG  
AATAAGGGCGACACGGAAATGTTGAATACTCATACTCTTCCTTTTTCAATATTATG  
AAGCATTATCAGGGTTATTGTCTCATGAGCGGATACATATTTGAATGTATTTAGAA  
AAATAAACAAATAGGGGTTCCGCGCACATTTCCCCGAAAAGTGCCACCTGAC
